# Supplementary material
Source: PubMed Central journal article supplement (PMC10999002)
Supplement: jama-e243841-s002.pdf [file jama-e243841-s002.pdf]

# Statistical analysis plan for the randomized trial of early detection of clinically significant prostate cancer (ProScreen)

Jaakko Nevalainen<sup>1</sup>, Jani Raitanen<sup>1</sup>, Kari Natunen<sup>1</sup>, Tuomas Kilpeläinen<sup>2</sup>, Antti Rannikko<sup>2,3</sup>, Teuvo Tammela<sup>4,5</sup>, Anssi Auvinen<sup>1</sup>, and the ProScreen Study Group

## Affiliations

1. Unit of Health Sciences, Faculty of Social Sciences, Tampere University, Tampere, Finland
2. Helsinki University Hospital, Department of Urology, Helsinki, Finland
3. Medical Faculty, University of Helsinki, Helsinki, Finland
4. Tampere University Hospital, Department of Urology, Tampere, Finland
5. Faculty of Medicine and Health Technology, Tampere University, Tampere, Finland

## ABSTRACT

**Background:** Evidence on the effectiveness of prostate cancer screening based on blood prostate-specific antigen is inconclusive and suffers from problematic balance between benefits and harms. However, it has been shown that detection of clinically non-significant prostate cancer can be reduced by magnetic resonance imaging combined with targeted biopsies.

**Aim:** To describe the analysis of the ProScreen randomized trial to assess the performance of the novel screening algorithm in terms of the primary outcome, prostate cancer mortality, and secondary outcomes which indicate benefits and harms of screening as whole.

**Methods:** The trial aims to recruit at least 111,000 men to guarantee sufficient statistical power. Men will be allocated in a 1:3 ratio to the screening and control arms. Interim analysis is planned at 10 years of follow-up, and the final analysis at 15 years. Difference between the trial arms in prostate cancer mortality will be assessed by Gray's test relying on the intention to screen analysis set of randomized men. Secondary outcomes will be the incidence of prostate cancer by disease aggressiveness, progression to advanced prostate cancer, death due to any cause and the cost-effectiveness of screening.

**Trial Registration:** NCT03423303

**Keywords:** effectiveness; prostate cancer screening; randomized trial; screening algorithm

## Introduction

Prostate cancer is the most common cancer in men in many industrialized countries and causes substantial mortality (Culp et al. 2020). Screening based on blood prostate-specific antigen (PSA) has been shown to decrease prostate cancer mortality, but the evidence from randomized trials is not conclusive (Hugosson et al. 2019, Pinsky et al. 2019). Systematic reviews of randomized controlled trials have concluded that PSA screening may at best lower prostate cancer mortality but not all-cause mortality; however, the balance between benefits and harms was regarded as problematic due to frequent overdiagnosis, overtreatment and complications from biopsies and cancer treatment (Ilic et al. 2018, Fenton et al. 2018, Paschen et al. 2022).

Several studies have shown that detection of clinically non-significant prostate cancer can be reduced by magnetic resonance imaging (MRI) combined with targeted biopsies of the suspect foci, instead of systematic biopsies of the entire prostate (Schoots et al. 2015; Ahmed et al. 2017). However, previous studies have solely focused on the diagnostic performance, i.e., cancer detection at a single evaluation.

Here we describe the analysis of the ProScreen randomized trial to assess the performance of the novel screening algorithm in terms of the primary outcome, prostate cancer mortality, and secondary outcomes which indicate benefits and harms of screening as whole. Following good statistical practice, this statistical analysis plan (version 1.0) was finalized prior to completion of recruitment and short-term follow-up data collection. It was written following the guidelines provided in Gamble *et al.* (2017). Any unforeseen deviations from the plan will be described and justified carefully in the respective reports.

## Trial overview

### Trial design

The ProScreen trial is a population-based, randomized multicenter trial that investigates the effectiveness of a novel screening strategy combining PSA, a four-kallikrein panel, and MRI on prostate cancer (PCa) mortality over a 15-year period from randomization (Auvinen et al. 2017). The rationale is to minimize detection of clinically insignificant cancers, while maintaining a high sensitivity for aggressive cases in order to reduce overdiagnosis without compromising mortality benefits. An interim analysis of PCa mortality is planned at 10 years of follow-up.

On 15 January 2018, the trial was registered at [clinicaltrials.gov](https://clinicaltrials.gov) (NCT03423303). The ethical committee of Helsinki University Hospital reviewed the protocol (tracking no. 2910/2017). Permissions to collect data from health care registers was obtained from Finnish Institute for Health and Welfare (before the era of FinData, Dnro THL/676/5.05.00/2018). A written informed consent is provided by each participant in the screening arm.

Recruitment started in October 2018 and is still ongoing.

### Study population

All men aged 50–63 years (at the time of sampling of the trial population) with Finnish or Swedish as mother tongue residing in trial municipalities constitute the trial population. Men with prevalent prostate cancer will be identified through the Finnish Cancer Registry and excluded.

We have identified for the trial the entire target population from the Finnish population registry, comprehensively without any sampling. The initial trial population consists of men residing in Helsinki and Tampere. So far, we have assessed 61,329 men for eligibility, and excluded 549 of them for previous PCa diagnosis prior to randomization. Out of the 15,189 men allocated to the screening arm, 14,727 have been invited and 53% of them have participated.

Currently, we are increasing the sample size by recruiting men also in the other municipalities within the Helsinki and Tampere metropolitan areas (Vantaa, Espoo, and Kauniainen, as well as Nokia, Lempäälä, Pirkkala, Ylöjärvi, and Kangasala with a total of 57,000 men in the target age group). The target population covers comprehensively all eligible men in the new municipalities, similar to the original Helsinki and Tampere areas.

### Sample size

We estimated that we could find 110,000–120,000 men in the target age group based on the population projections from 2020 to 2034 from the ten municipalities (Statistics Finland 2021). We requested the overall number of deaths and the number of PCa deaths from Statistics Finland by age group from 1990 to 2019. The proportion of PCa deaths had barely changed at all during the 30 years period and hence, we based our sample size calculation on these figures. With a 1:3 random allocation to the screening arm relative to the control arm, we estimated that at least 240 PCa deaths would occur in the control arm during the first ten years of the trial, and at least 520 PCa deaths by 15 years of follow-up.

Assuming a relative hazard of 0.75 for the screening relative to the control arm, Schoenfeld's formula indicates that an 80% power would be reached by a total of 506 PCa deaths (Schoenfeld 1983) with type I error rate set at 5%. Assuming total of 650 PCa deaths – 520 in the control arm and 130 in the screening arm – the power of the study would be 89%. Hence, we aim at a final sample size of at least 111,000 men to ensure adequate statistical power and precision at the final analysis.

### Randomization and screening intervals

All eligible men will be randomly allocated to screening and control arms in a 1:3 ratio. Within the screening arm, re-screening interval is adapted by the baseline PSA:

- Men with initial PSA  $\geq 3$  ng/ml are invited after every two years,
- Men with PSA 1.5–2.99 ng/ml after every four years, and
- Men with PSA  $< 1.5$  ng/ml after every six years.

By now, we have randomized 61,193 men with 15,299 allocated to the screening arm and 45,894 to the control arm. Analyses will compare the entire screening arm, regardless of the actual screening interval employed, to the control arm, unless otherwise specified.

Randomization list consists of batches of randomized men. The list is generated centrally by a designated study biostatistician at the coordinating unit, who maintains the documentation including program codes and the resulting lists include information of randomization dates, personal identification numbers (linkable to study ID number) and the arm allocated. Randomization lists are only shared confidentially to study personnel who need it for study conduct.

### Screening procedures

At every screening attendance, three consecutive tests are conducted in a stepwise manner before biopsy:

1. All participating men give a blood sample for determination of PSA at a local laboratory.
2. If the PSA is 3 ng/ml or higher, 4Kscore is analyzed from a second vial of plasma using an algorithm incorporating four proteins (total PSA, free PSA, intact PSA and hK2) and age. The result is expressed as probability of a clinically significant PCa calculated at the coordinating unit.
3. Men with both  $PSA \geq 3$  and  $4Kscore \geq 7.5\%$  are referred to MRI. T2-weighted, diffusion-weighted and dynamic contrast-enhanced imaging is employed in accordance with the European Society for Urogenital Radiology guideline (de Rooij 2020). The findings are classified according to the Prostate Imaging Reporting and Data System (PI-RADS v2.1), which is a 5-point scale to combine the MRI findings and indicate the likelihood of a significant cancer. Scores of 3–5 indicate at least a suspect finding warranting directed biopsy.

Only targeted biopsies are employed, with 2–4 cores per region of interest depending on the size. Only screen-positive men with negative MRI but PSA density  $>0.15$  undergo systematic biopsy as a safety measure (to avoid missing clinically significant cancers). Similar fusion-guided biopsy systems are used at different trial sites and evaluated by experienced uropathologists using standardized procedures.

A random sample of screen-negative (on test steps 1 and 2) men are also invited to prostate MRI and asked to give blood, urine and stool samples in order to serve as a control group to estimate frequency of suspicious MRI findings in the general population, and as a reference group in analyses of biological samples.

### Protocol deviations

A tabular presentation of different type of protocol deviations along with their frequencies and percentages will be presented. Any protocol deviations detected after randomization will be

carefully documented. Among them, men not meeting the eligibility criteria of the trial at date of randomization can be excluded from the analysis.

In the case that a substantial proportion of men conduct major protocol violations, separate per protocol analyses will be conducted to support the main analyses. In the screening arm, poor attendance, or compliance to screening procedures is likely to be observed. In the control arm, we will obtain data on contamination, i.e., mostly self-initiated PSA testing.

When considering unforeseen lack of compliance to the protocol, all means to ensure objectivity in the exclusion principles from per protocol analyses will be taken. Participants in both arms will be considered according to the same principles. Protocol deviations not related to the screening procedures are expected to appear on approximately 1:3 ratio. Obvious deviation from this ratio would be reported and interpreted as a potential source of bias.

### Blinding

Blinding in the conventional sense was not applicable: men are not unaware of their screening invitations. Hence, this is an open trial with screening and control arms.

Concrete measures to prevent bias, if any, from the awareness of the trial arm were nevertheless taken: (i) the control arm is blind to the fact that they are part of the trial; (ii) allocation concealment is ensured by the centralized randomization procedure preventing foreknowledge of upcoming arm allocation; and (iii) communication to the general public on trial is kept to the minimum to prevent contamination (e.g. by self-initiated PSA testing) among men in the control arm.

In addition to these measures, we underline that the primary outcome of the study, PCa death, is an objective outcome. The possibility of bias in its evaluation only relates to the assessment of the cause of death. Importantly, a previous study within the ERSPC trial has shown that the cause-of-death data provided by Statistics Finland agreed almost perfectly with the assessment of a blinded expert panel in the Finnish center of the trial (Mäkinen et al. 2008, Kilpeläinen et al. 2016).

### Data collection process

Table 1 summarizes the stages of the data collection process, targeted participants, and information and samples obtained.

**Table 1.** Data collection process of the ProScreen trial.

| Process stage | Target population        | Information collected                                                                                                                                                                                                                                                                                                                                                                                                                                                             | Samples collected                                                                                 |
|---------------|--------------------------|-----------------------------------------------------------------------------------------------------------------------------------------------------------------------------------------------------------------------------------------------------------------------------------------------------------------------------------------------------------------------------------------------------------------------------------------------------------------------------------|---------------------------------------------------------------------------------------------------|
| Baseline      | Participants             | Family history<br>Previous PSA and Bx<br>Generic QoL/utility (15D, EQ5D)<br>Out-of-pocket costs                                                                                                                                                                                                                                                                                                                                                                                   | Plasma<br>Serum<br>Whole blood                                                                    |
| Biopsy        | Screen-positive men      | Post-biopsy symptoms (0, 30 days)<br><br>Fusion biopsies: number of ROIs, number of biopsies, length of samples, length of cancer, portion of Gleason 4 or 5 per ROI, extracapsular extension<br><br>Systemic biopsies: Biopsy length, cancer length and Gleason score per sample, total length of samples, total length of cancer, portion of cancer, global Gleason score, grade group, portion of Gleason 4 or 5, perineural invasion, high grade PIN, extracapsular extension | Urine<br>Stool<br>RNA, DNA<br>Cancer tissue and prostate tissue<br>Plasma<br>Serum<br>Whole blood |
| Diagnosis     | Men with prostate cancer | Disease-specific QoL (EPIC-26, MAX-PC)<br><br>EQ5D, 15D, out-of-pocket costs<br><br>Gleason/ISUP grade group, number of positive cores, length of cancer, treatment                                                                                                                                                                                                                                                                                                               |                                                                                                   |

### Study outcomes and other relevant variables

Primary outcome of the trial is death from prostate cancer. Causes of death will be obtained from the Statistics Finland database and the underlying causes of death will be considered when evaluating if the man died from PCa or from other causes. Cancer cases in the entire trial population including the control arm and non-participants in the screening arm are identified from pathology databases of the two hospitals and through linkages to the Finnish Cancer Registry using the unique PID assigned to all Finnish residents to ensure complete coverage and avoid duplicates (double count).

Secondary outcomes are:

- Diagnosis of prostate cancer
- Progression to advanced prostate cancer
- Death due to any cause
- Cost-effectiveness of screening (15D and EQ5D instruments)

Adverse outcome variables to monitor screening related harms are:

- Quality of life impacts of screening and quality of life among men with PCa (EPIC26 instrument)

- Prostate cancer related anxiety (MAX-PC questionnaire)
- Complications from biopsy (PRECISION questionnaire)

## Statistical analysis

Main analyses will rely on the intention to screen (ITS) principle and will include all randomized men in the two trial arms who were alive and eligible (free of prostate cancer) at the date of randomization. Those men who became ineligible between the date of randomization and first screening invitation will remain in the ITS analysis set.

Two-sided statistical tests will be used, and the overall significance level will be set at 5%. Corresponding p-values will be accompanied with estimates of differences and their 95% confidence intervals.

### Analysis of the primary outcome

The primary outcome of the trial is death from prostate cancer. This is a superiority trial regarding the primary outcome and the comparisons between trial arms will be analyzed and presented on this basis.

Those men who survived will be considered as right-censored observations at the time passed between the time of analysis and time of randomization period. Those men who were lost to follow-up (e.g., due to emigration) will be considered as censored at that particular time (e.g., at emigration). Time to death, defined as the difference between the date of death and date of randomization, will be used as the event time for the analysis.

To evaluate differences between screening and control arms in prostate cancer specific mortality, Gray's test (Gray 1988) for testing the null hypothesis of equality of cumulative incidence functions will be used. This test differs from the commonly used log rank test in how competing risks of death are treated and is based on the subdistribution hazard of prostate cancer cause of death.

The test will be complemented by reporting the number of PCa deaths, number of men at risk and estimated cumulative incidence functions for each trial arm over follow-up time. The arms will be compared in absolute risks (number needed to invite i.e., the inverse of the risk difference and number needed to diagnose per averted prostate cancer death, i.e., the ratio of excess incidence to mortality reduction), as well as and relative measures of effect (hazard ratios). Descriptive summaries will also be presented by trial centers, age group at randomization.

### Secondary analyses of the primary outcome

Fine-Gray model for the subdistribution hazard will be used to conduct analyses adjusted for background factors. Outcomes will be compared between age groups and trial centers, and in case of differences, analyses to control for trial center and for age at randomization (categorized as 50–54, 55–59, 60–65 years) will be conducted.

Per protocol analyses excluding men with substantial protocol deviations, such as repeated non-attendance or ineligibility before invitation to screening (with pseudo invitation dates for the control arm), will be conducted if considered pertinent. Additional analyses to correct for

contamination and non-compliance, i.e., estimation of efficacy, will be taken by best practices methods at the time of the analyses (e.g., Cuzick et al. 1997).

Descriptive analyses to study effect heterogeneity by center and age group will be performed to complement these analyses. Additional analyses requested by external reviewers or editors in peer-review processes will also be done.

## Analysis of secondary outcomes

### Diagnosis of prostate cancer

The analysis of cumulative incidence of PCa by disease aggressiveness intends to assess screening impact on detection of clinically significant PCa (representing potential benefit through early treatment) and clinically insignificant PCa (indicating overdiagnosis). The intention is to assess the extent of detection of clinically significant PCa by screening relative to the control arm, and extent of overdiagnosis relative to the control arm. This will inform about the degree of accomplishing rationale of the trial, i.e., detection of aggressive cases at least similar to that in PSA-based screening, while substantially decreasing the yield of low-risk cases.

Disease aggressiveness will be defined by ISUP Gleason grade group. The analyses will be conducted separately for the detection of clinically significant (Gleason 7+ or ISUP 2+) and clinically insignificant (Gleason <7 or ISUP 1) PCa. Secondary definition of csPCa includes also ISUP 3+ (Gleason 4+3 or higher), maximum length of cancer tissue in biopsy and number of biopsy cores with cancer.

Gray's test and corresponding hazard ratios will be used infer screening benefits and overdiagnosis compared to the control arm. Besides cumulative incidence, the ratio of aggressive to non-aggressive cases (or proportion of aggressive cases) will also be reported.

Cumulative incidence for both outcomes will be estimated by trial arm. The overall PCa incidence combines screening benefits and harms and is thus regarded of minor importance in the interpretation of screening impact. Tabular presentations of age at diagnosis, disease stage and grade at diagnosis will be presented.

Both intention to screen (by allocation) and per protocol (screening participants and non-participants) analyses will be conducted for each screening round. For screening participants, screen-detected and interval cases will be reported separately, and screen-detected cases will be broken down by those detected in targeted biopsies of MRI-positive lesions (screening protocol evaluated) and systematic biopsies in screen-negative men with PSA density >0.15 (safety measure to avoid missing clinically significant cases). Any cases detected in a random sample of screen-negative men invited to MRI (analyses to assess underlying prevalence of prostate cancer) will also be reported separately. Analyses to evaluate an optimized screening algorithm will include exclusion of cases with PI-RADS score 3 and 4Kscore calculated also incorporating information on previous biopsies (ignored in the main analysis), as well as higher cut-off values for PSA and 4Kscore.

### Progression to advanced prostate cancer

The analysis of advanced prostate cancer will compare the cumulative incidence of cancer progression (metastasis and/or biochemical relapse) from the initial PCa diagnosis between



screening and control arms. The purpose of the analysis is to evaluate differences between the arms in the relative hazards of advanced PCa among those with a diagnosed PCa.

The origin of the analysis will be the time of diagnosis. Cumulative incidence rates will be estimated by the Kaplan-Meier method, and differences between trial arms will be estimated by Cox regression models adjusted by age at diagnosis.

#### Death due to any cause

The analysis of all-cause mortality aims to show that the trials arms are comparable with each other and the general male population in Finland. These analyses will not be used to describe effectiveness of screening. Cumulative survival and mortality rates will be estimated by the Kaplan-Meier method, from time of randomization onwards, displayed together with frequencies of events and men at risk by trial arm, and by age at randomization to allow these assessments.

This analysis will focus on the intention to screen analysis set.

#### Cost-effectiveness

A cost-effectiveness analysis will be performed, incorporating cost data for both out-of-pocket estimated from surveys and service cost data collected from health care providers as well mortality results (ITS analysis) and utilities based on repeated surveys with 15D and EQ5D instruments (on a random sample of participants). The comparator is no active screening, here represented by the control arm. The main outcome is the incremental cost-effectiveness ratio in terms of costs per life-year.

A preliminary and exploratory cost effectiveness study can be conducted after the last of the follow-up surveys have been returned, approximately at 3 years after the randomization of the last man into the trial. We plan to undertake a full cost-effectiveness analysis around the time when the evidence on the effectiveness of screening regarding primary outcome has been obtained; this will most likely be near to the analysis at 15 years.

#### Quality of life

These analyses aim to evaluate the disease-specific short-term and long-term impacts of screening on quality of life as well as quality of life among men with PCa. Two disease-specific questionnaires, EPIC26 instrument and MAX-PC questionnaires will be used to measure quality of life at 0, 6, 12, and 24 months from PCa diagnosis in both trial arms.

Standard scoring of the EPIC26 instrument will be used. Summary statistics of the questionnaire items over time and by trial arms will be calculated to estimate the development of quality of life of men with PCa from diagnosis onwards. Repeated measurements ANOVA variance will be conducted for domain-grouped scores to evaluate differences in quality of life between the arms following PCa diagnosis.

Prostate cancer related anxiety is measured with the MAX-PC questionnaire. Results will be presented as frequencies and percentages overall and by trial arm.

Generic quality of life and utilities are evaluated using the 15D and EQ5D instruments as described in the cost-effectiveness section.

### Analysis of adverse outcomes

Adverse outcomes mainly relate to the harms due to biopsies. Adverse effects of prostate biopsy are monitored using the questionnaire developed for the PRECISION trial covering pain and other symptoms immediately after biopsy and at 30 days following biopsy. The number of biopsies, as well as the number (%) and type of complications among those with biopsies will be reported.

### Interim analyses and data monitoring

The first analysis of PCa mortality will be conducted at 10 years and the final analysis at 15 years. By this we mean that the median follow-up time is at least 10 or 15 years, respectively, for each of the analyses. As we do not intend to stop the trial at 10 years, these interim analyses will be considered as preliminary information. Interim analyses at 10 years will include also analyses of shorter-term benefits.

To control the overall type I error rate (5%) of the trial, we will employ the O'Brien-Fleming rule for alpha spending function. We set the amount of information at 0.5 at 10 years based on the expected numbers of PCa deaths. Thus, by implementation of the O'Brien-Fleming algorithm, the resulting significance level at 10-year interim analysis will be 0.0056, and at the 15-year final analysis 0.0444.

An independent data monitoring committee (DMC) oversees the trial conduct, and its main task is to ensure safety of the participants. Safety in this context means that screening or screening procedures should not lead to unacceptable disadvantage for the participants in the light of screening benefits. This could take place if the screening intervention had materially worse performance in detecting clinically relevant prostate cancer than anticipated. The DMC is given a report of the screening results first every six months and after the first year every 12 months. The DMC can also request any additional information they regard as pertinent to their task. In case of concern, the DMC can recommend discontinuation of the trial; in practice that would mean stopping recruitment and discontinuation of further screening procedures. In addition, they have a mandate to suggest modifications to the trial protocol.

### Handling of missing data

Extent of missing data will be described, for example, by presenting the number of individuals with missing values per variable.

For outcome variables relying on dates – dates of randomization, censoring, diagnosis or death – incomplete dates will be imputed by 15 (in the case that the day variable was missing, but known month and year), and by 30/6 (in the case that only the year was known).

In case a substantial proportion of men have missing data on one or more variable needed for the effectiveness analysis in question, multiple imputation methods will be used to demonstrate the robustness of findings (Little *et al.* 2012). Imputation models will include outcome variables and trial arm in addition to all variables relevant to the particular analysis. Final estimates will be derived by combining estimates and their standard errors across data sets using Rubin's rules.

### Data management and quality assurance

RedCap database application is used for data management in the trial, covering everything from questionnaires and lab results to MRI findings, diagnoses and causes of death. RedCap allows access defined by two-factor authentication (2FA) and flexible definition of user-specific functions and rights.

In REDCap, variable specific parameters and predetermined options are used to prevent entering invalid data (e.g. predefined values and acceptable ranges). All data is verified from the original data source and monitored monthly. Until the verification, data is saved as incomplete or unverified. Lead times between screening tests are monitored every 6-8 weeks. For the laboratory work (including sampling, processing, and storing) each task has a protocol shared by the study centers. Any deviations from the sample specific protocol are documented.

### Conclusion

This statistical analysis plan lays out the plans for outcomes of the trial, including the definitions of important outcomes, analysis principles and interpretation, methods for primary analysis, pre-specified subgroup analysis, and secondary analysis.

### References

- Ahmed HU, El-Shater Bosaily A, Brown LC, Gabe R, Kaplan R, Parmar MK, Collaco-Moraes Y, Ward K, Hindley RG, Freeman A, Kirkham AP, Oldroyd R, Parker C, Emberton M; PROMIS study group. Diagnostic accuracy of multi-parametric MRI and TRUS biopsy in prostate cancer (PROMIS): a paired validating confirmatory study. *Lancet*. 2017 Feb 25;389(10071):815-822. doi: 10.1016/S0140-6736(16)32401-1. Epub 2017 Jan 20. PMID: 28110982.
- Auvinen A, Rannikko A, Taari K, Kujala P, Mirtti T, Kenttämies A, Rinta-Kiikka I, Lehtimäki T, Oksala N, Pettersson K, Tammela TL. A randomized trial of early detection of clinically significant prostate cancer (ProScreen): study design and rationale. *Eur J Epidemiol*. 2017 Jun;32(6):521-527. doi: 10.1007/s10654-017-0292-5. Epub 2017 Jul 31. PMID: 28762124.
- Culp MB, Soerjomataram I, Efstathiou JA, Bray F, Jemal A, Recent global patterns in prostate cancer incidence and mortality rates. *Eur Urol* 2020;77:38-52
- Cuzick J, Edwards R, Segnan N. Adjusting for non-compliance and contamination in randomized clinical trials. *Stat Med*. 1997 May 15;16(9):1017-29. doi: 10.1002/(sici)1097-0258(19970515)16:9<1017::aid-sim508>3.0.co;2-v. Erratum in: *Stat Med*. 2007 Sep 10;26(20):3821. PMID: 9160496.
- Fenton JJ, Weyrich MS, Durbin S et al. Prostate-specific antigen-based screening for prostate cancer. *JAMA* 2018;319:1914-31
- Gamble C, Krishan A, Stocken D, Lewis S, Juszcak E, Doré C, et al. Guidelines for the content of statistical analysis plans in clinical trials. *JAMA*. 2017;318(23):2337-43. <https://doi.org/10.1001/jama.2017.18556>.

Gray RJ. A class of K-sample tests for comparing the cumulative incidence of a competing risk. *Ann Stat* 16:1141-1154, 1988

Hugosson J, Roobol MJ, Månsson M, et al. 16-year follow-up of the European Randomised Study of Screening for Prostate Cancer (ERSPC). *Eur Urol* 2019;76:43-51

Ilic D, Djulbegovic M, Jung JH, Hwang EC, Zhou Q, Cleves A, Agoritsas T, Dahm P. Prostate cancer screening with prostate-specific antigen (PSA) test: a systematic review and meta-analysis. *BMJ*. 2018 Sep 5;362:k3519. doi: 10.1136/bmj.k3519. PMID: 30185521; PMCID: PMC6283370.

Kilpeläinen TP, Mäkinen T, Karhunen PJ, Aro J, Lahtela J, Taari K, Talala K, Tammela TL, Auvinen A. Estimating bias in causes of death ascertainment in the Finnish Randomized Study of Screening for Prostate Cancer. *Cancer Epidemiol*. 2016 Dec;45:1-5. doi: 10.1016/j.canep.2016.08.022. Epub 2016 Sep 14. PMID: 27636505.

Little RJ, D'Agostino R, Cohen ML, Dickersin K, Emerson SS, Farrar JT, Frangakis C, Hogan JW, Molenberghs G, Murphy SA, Neaton JD, Rotnitzky A, Scharfstein D, Shih WJ, Siegel JP, Stern H. The prevention and treatment of missing data in clinical trials. *N Engl J Med*. 2012 Oct 4;367(14):1355-60. doi: 10.1056/NEJMs1203730. PMID: 23034025; PMCID: PMC3771340.

Mäkinen, T., Karhunen, P., Aro, J., Lahtela, J., Määttänen, L. and Auvinen, A. (2008), Assessment of causes of death in a prostate cancer screening trial. *Int. J. Cancer*, 122: 413-417. <https://doi.org/10.1002/ijc.23126>

Paschen U, Sturz S, Fleer D et al. Assessment of prostate-specific antigen screening. *BJU Int* 2022;129:280-289

Pinsky PF, Miller E, Prorok P, et al. Extended follow-up for prostate cancer incidence and mortality among participants in the PLCO screening trial. *BJU Int* 2019;123:854-860

Schoots IG, Roobol MJ, Nieboer D, Bangma CH, Steyerberg EW, Hunink MG. Magnetic resonance imaging-targeted biopsy may enhance the diagnostic accuracy of significant prostate cancer detection compared to standard transrectal ultrasound-guided biopsy: a systematic review and meta-analysis. *Eur Urol*. 2015 Sep;68(3):438-50. doi: 10.1016/j.eururo.2014.11.037. Epub 2014 Dec 3. PMID: 25480312.

Rannikko A, Leht M, Mirtti T, Kenttämies A, Tolonen T, Rinta-Kiikka I, Kilpeläinen TP, Natunen K, Lilja H, Lehtimäki T, Raitanen J, Kujala P, Ronkainen J, Matikainen M, Petas A, Taari K, Tammela T, Auvinen A. Population-based randomized trial of screening for clinically significant prostate cancer ProScreen: a pilot study. *BJU Int*. 2022 Aug;130(2):193-199. doi: 10.1111/bju.15683. Epub 2022 Jan 8. PMID: 34958531; PMCID: PMC9327584.

de Rooij M, Israël B, Tummers M, Ahmed HU, Barrett T, Giganti F, Hamm B, Løgager V, Padhani A, Panebianco V, Puech P, Richenberg J, Rouvière O, Salomon G, Schoots I, Veltman J, Villeirs G, Walz J, Barentsz JO. ESUR/ESUI consensus statements on multi-parametric MRI for the detection of clinically significant prostate cancer: quality requirements for image acquisition, interpretation and radiologists' training. *Eur Radiol*. 2020 Oct;30(10):5404-5416. doi: 10.1007/s00330-020-06929-z. Epub 2020 May 19. PMID: 32424596; PMCID: PMC7476997.

Statistics Finland's StatFin online service. Available at:  
<https://statfin.stat.fi/PXWeb/pxweb/en/StatFin/> (Accessed 9 June 2021).

Schoenfeld DA. Sample-size formula for the proportional-hazards regression model.  
Biometrics 1983;39:499-503.

Field Code Changed
