# Supplementary material
Source: PubMed Central journal article supplement (PMC10999002)
Supplement: jama-e243841-s003.pdf [file jama-e243841-s003.pdf]

## Supplemental Online Content

Auvinen A, Tammela TLJ, Mirtti T, et al; ProScreen Trial Investigators. Prostate Cancer Screening With PSA, Kallikrein Panel, and MRI: The ProScreen Randomized Trial. *JAMA*. doi:10.1001/jama.2024.3841

**eMethod.** Imputation method for replacing missing Grade Group values

**eTable 1.** Previous PSA test and prostate biopsies among men in the control group. Results from a mail survey to a random sample of 2009 men with 574 participants

**eTable 2.** Numbers of prostate cancer detected at screening by Grade Group, age group, PSA, kallikrein panel risk score, and MRI PI-RADS score

**eTable 3.** Detailed Grade Group classification of cases detected at screening by biopsy type (targeted or systematic)

**eTable 4.** Age, PSA and kallikrein panel risk score (median with interquartile range) for men with screen-detected Grade Group 1 cancer, Grade Group 2–5 cancer and benign biopsy result (excluding one case with a missing Gleason score)

**eTable 5.** Analysis of cancer detection by trial group with imputation of missing Grade Group based on the stratum-specific observed relative frequencies\* (by trial group and screening attendance)

**eTable 6.** Clinical TNM stage in cancers detected at screening, among men invited to screening who did not participate, and in the control group. Incident cases in the non-screened groups include those detected in surgery for benign prostatic hyperplasia (one in men invited to screening who did not participate and fourteen in the control group)

**eTable 7.** Primary treatment of prostate cancers by trial group, number of cases (%)

This supplemental material has been provided by the authors to give readers additional information about their work.

**eMethod. Imputation method for replacing missing Grade Group values**

The cancer case with a missing Grade Group among the participating men in the screening group was assigned a Grade Group 2, as this was the most common observation in this group (63/160).

Of the seven cases with missing Grade Group in men who were allocated to screening but did not participate, one was assigned to Grade Group 1, one GG 2, two GG 3 and three GG 4, following the distribution of the observed values (8/49 GG1, 10/49 GG2, 11/49 GG3 and 20/49 GG4-5)

In the control arm, of the eight cases with missing Grade Group, two were assigned to Grade Group 1, three GG 2, one GG 3 and two GG 4-5, as 65/347 (19%) of the cases in the control group with known Grade Group were GG1 and 121/347 (35%) GG2, 62 (18%) GG3 and 99 (29%) GG 4-5.

eTable 1. Previous PSA test and prostate biopsies among men in the control group. Results from a mail survey to a random sample of 2009 men with 574 participants

| Previous PSA (571 responses)             | <b>N (%)</b> |
|------------------------------------------|--------------|
| Past 12 months                           | 99 (17)      |
| Past 12–24 months                        | 90 (16)      |
| Past 3–5 years                           | 67 (12)      |
| More than 5 years ago                    | 24 (4)       |
| Never                                    | 291 (51)     |
| Previous prostate biopsy (569 responses) |              |
| Yes                                      | 19 (3)       |

eTable 2. Numbers of prostate cancer detected at screening by Grade Group, age group, PSA, kallikrein panel risk score, and MRI PI-RADS score

|                                    | Grade Group 1, N (%) | Grade Group 2–5, N (%) | Number of men |
|------------------------------------|----------------------|------------------------|---------------|
| <b>Age at entry (years)</b>        |                      |                        |               |
| 50–54                              | 4 (0.1)              | 17 (0.3)               | 4998          |
| 55–59                              | 10 (0.2)             | 50 (0.9)               | 5541          |
| 60–64                              | 18 (0.4)             | 61 (1.4)               | 4308          |
| <b>Previous PSA</b>                |                      |                        |               |
| Past 12 months                     | 4 (0.5)              | 17 (2.0)               | 855           |
| Past 12-24                         | 3 (0.4)              | 14 (1.7)               | 832           |
| Past 2-5 years                     | 5 (0.6)              | 15 (1.9)               | 791           |
| >5 years ago                       | 1 (0.2)              | 10 (2.5)               | 406           |
| No                                 | 16 (0.4)             | 56 (1.5)               | 3629          |
| Missing                            | 3 (0.2)              | 16 (1.3)               | 1231          |
| <b>Previous prostate biopsy</b>    |                      |                        |               |
| Yes                                | 1 (0.5)              | 10 (5.1)               | 195           |
| No                                 | 26 (0.5)             | 102 (1.6)              | 6318          |
| Missing                            | 5 (0.4)              | 16 (1.3)               | 1231          |
| <b>Family history</b>              |                      |                        |               |
| Yes                                | 5 (0.5)              | 23 (2.5)               | 927           |
| No                                 | 23 (0.4)             | 89 (1.6)               | 5550          |
| Missing                            | 4 (0.3)              | 16 (1.3)               | 1267          |
| <b>PSA (ng/mL)</b>                 |                      |                        |               |
| 3.0–4.9                            | 20 (4.0)             | 52 (10.4)              | 499           |
| 5.0–10.0                           | 10 (5.3)             | 45 (23.8)              | 189           |
| >10                                | 2 (3.1)              | 31 (48.4)              | 64            |
| <b>Kallikrein panel risk score</b> |                      |                        |               |
| 7.5–14.9                           | 14 (5.9)             | 24 (10.0)              | 239           |
| 15–24.9                            | 8 (6.2)              | 31 (24.0)              | 129           |
| ≥25                                | 10 (6.3)             | 73 (46.2)              | 158           |
| <b>MRI PI-RADS score</b>           |                      |                        |               |
| <3*                                | 11 (3.6)             | 16 (5.3)               | 303           |
| 3                                  | 8 (13.1)             | 16 (26.2)              | 61            |
| 4                                  | 10 (10.4)            | 53 (55.2)              | 96            |
| 5                                  | 3 (6.0)              | 43 (86.0)              | 50            |

\*Fifty-three men biopsied for PSA density  $\geq 0.15$  ng/mL<sup>2</sup>

eTable 3. Detailed Grade Group classification of cases detected at screening by biopsy type (targeted or systematic)

| Type of biopsy                 | Grade group |    |    |    |    | Missing | Total |
|--------------------------------|-------------|----|----|----|----|---------|-------|
|                                | 1           | 2  | 3  | 4  | 5  |         |       |
| Targeted biopsy <sup>a</sup>   | 22          | 52 | 42 | 10 | 9  | 1       | 136   |
| Systematic biopsy <sup>b</sup> | 10          | 11 | 3  | -  | 1  | -       | 25    |
| TOTAL                          | 32          | 63 | 45 | 10 | 10 | 1       | 161   |

<sup>a</sup>Indication: PI-RADS score 3-5 with PSA  $\geq 3.0$  ng/mL and kallikrein panel score  $\geq 7.5\%$ .

<sup>b</sup>Indication: Negative MRI (PI-RADS $<3$ ) with PSA density  $>0.15$  ng/mL<sup>2</sup> with PSA  $\geq 3$  ng/mL and kallikrein panel risk score  $\geq 7.5\%$ .

eTable 4. Age, PSA and kallikrein panel risk score (median with interquartile range) for men with screen-detected Grade Group 1 cancer, Grade Group 2–5 cancer and benign biopsy result (excluding one case with a missing Gleason score)

|                                          | Grade Group 1    | Grade Group 2–5  | Benign biopsy <sup>a</sup> |
|------------------------------------------|------------------|------------------|----------------------------|
| Age at entry <sup>b</sup>                | 60 (56.5–62)     | 59 (57–62)       | 60 (56–62)                 |
| Screening PSA (ng/mL) <sup>b</sup>       | 4.8 (3.8–7.0)    | 5.8 (4.1–10.0)   | 4.8 (3.6–7.7)              |
| Kallikrein panel risk score <sup>b</sup> | 17.8 (10.4–29.8) | 27.8 (19.2–52.7) | 16.7 (11.1–28.9)           |
| Number of men                            | 32               | 128              | 101                        |

<sup>a</sup>Men with PSA  $\geq 3$  ng/mL, kallikrein panel risk score  $\geq 7.5\%$  and PI-RADS score 3–5 but no cancer at biopsy <sup>b</sup>Median and interquartile range

eTable 5. Analysis of cancer detection by trial group with imputation of missing Grade Group based on the stratum-specific observed relative frequencies\* (by trial group and screening attendance)

|                                     | Screening group       |                    | Control group (N=45,544) | Risk difference in screened men vs. control arm (per protocol analysis) | Risk difference in screening arm vs. control arm (intention to screen analysis) |
|-------------------------------------|-----------------------|--------------------|--------------------------|-------------------------------------------------------------------------|---------------------------------------------------------------------------------|
|                                     | Screened men (N=7744) | All men (N=15,201) |                          |                                                                         |                                                                                 |
| Grade Group 1                       | 32 (0.41%)            | 40 (0.26%)         | 67 (0.15%)               | 0.27% (95% CI 0.12–0.41)                                                | 0.12% (95% CI 0.03–0.20)                                                        |
| Grade Group 2–5                     | 129 (1.67%)           | 179 (1.18%)        | 288 (0.63%)              | 1.03% (95% CI 0.74–1.33)                                                | 0.55% (95% CI 0.36–0.73)                                                        |
| All cancers                         | 161 (2.08%)           | 219 (1.44%)        | 355 (0.78%)              | 1.30% (95% CI 0.97–1.63)                                                | 0.66% (95% CI 0.45–0.87)                                                        |
| Detailed Grade Group classification |                       |                    |                          |                                                                         |                                                                                 |
| 1                                   | 32 (0.41%)            | 40 (0.26%)         | 67 (0.15%)               | 0.27% (95% CI 0.12–0.41)                                                | 0.12% (95% CI 0.03–0.20)                                                        |
| 2                                   | 64 (0.83%)            | 78 (0.51%)         | 124 (0.27%)              | 0.56% (95% CI 0.35–0.76)                                                | 0.24% (95% CI 0.12–0.37)                                                        |
| 3                                   | 45 (0.58%)            | 59 (0.39%)         | 63 (0.14%)               | 0.44% (95% CI 0.27–0.61)                                                | 0.25% (95% CI 0.14–0.35)                                                        |
| 4–5                                 | 20 (0.26%)            | 42 (0.28%)         | 101 (0.22%)              | 0.04% (95% CI -0.08, 0.16)                                              | 0.05% (95% CI -0.04, 0.15)                                                      |
| Total                               | 161                   | 219                | 355                      |                                                                         |                                                                                 |

\*One missing case in screening participants was assigned GG 2; seven missing cases among men assigned to screening who did not participate were assigned to GG 1 (one case), GG 2 (one), GG 3 (two cases) and GG 4–5 (three cases) to 4+4; in the control arm, of the eight cases with missing Grade Group two cases were assigned to GG 1, three GG 2, one GG 3, and two cases GG 4–5. See also Appendix 1.

eTable 6. Clinical TNM stage in cancers detected at screening, among men invited to screening who did not participate, and in the control group. Incident cases in the non-screened groups include those detected in surgery for benign prostatic hyperplasia (one in men invited to screening who did not participate and fourteen in the control group)

| TNM stage            | Screened men in the intervention group, N (%) | Men invited who did not participate, N (%) | Screening group total, N (%) | Control group, N (%) |
|----------------------|-----------------------------------------------|--------------------------------------------|------------------------------|----------------------|
| T1–2 <sup>a</sup>    | 142 (88)                                      | 31 (53)                                    | 173 (79)                     | 276 (78)             |
| T3–4/N1 <sup>b</sup> | 13 (8)                                        | 11 (19)                                    | 24 (11)                      | 30 (8)               |
| M1 <sup>c</sup>      | 4 (2)                                         | 10 (17)                                    | 14 (6)                       | 34 (10)              |
| Missing              | 2 (1)                                         | 6 (10)                                     | 8 (4)                        | 15 (4)               |
| Total                | 161                                           | 58                                         | 219                          | 355                  |

<sup>a</sup>N0/Nx and M0/Mx <sup>b</sup>M0/Mx <sup>c</sup>Any T and N



eTable 7. Primary treatment of prostate cancers by trial group, number of cases (%)

| Treatment modality                    | Screened men in the intervention group, N (%) | Men invited to screening who did not participate | Entire screening group, N (%) | Control group, N (%) |
|---------------------------------------|-----------------------------------------------|--------------------------------------------------|-------------------------------|----------------------|
| Active surveillance                   | 62 (39)                                       | 8 (14)                                           | 70 (32)                       | 85 (24)              |
| Prostatectomy alone                   | 46 (29)                                       | 15 (26)                                          | 61 (28)                       | 116 (33)             |
| Prostatectomy with adjuvant treatment | 8 (5)                                         | 2 (3)                                            | 10 (5)                        | 9 (3)                |
| Radiotherapy alone                    | 11 (7)                                        | 4 (7)                                            | 15 (7)                        | 28 (8)               |
| Radiotherapy with adjuvant treatment  | 32 (20)                                       | 19 (33)                                          | 51 (23)                       | 75 (21)              |
| Androgen deprivation therapy          | –                                             | 6 (10)                                           | 6 (3)                         | 26 (7)               |
| None, other or unknown                | 2 (1)                                         | 4 (7)                                            | 6 (3)                         | 16 (5)               |
| Total                                 | 161                                           | 58                                               | 219                           | 355                  |
